# Supplementary material for: Highly crystallized iron oxide nanoparticles as effective and biodegradable mediators for photothermal cancer therapy
Source: Royal Society of Chemistry journal article supplement (doi:10.1039/c3tb21338b), 2013-11-12
Supplement: c3tb21338b.pdf [file c3tb21338b.pdf]

**Supporting information for:**

## **Highly crystallized iron oxide nanoparticle as an effective and biodegradable mediator for photothermal cancer therapy**

Hongwei Chen<sup>1,\*</sup>, Joseph Burnett<sup>1</sup>, Fuxiang Zhang<sup>2</sup>, Jiaming Zhang<sup>2</sup>, Hayley Paholak<sup>1</sup>, and Duxin Sun<sup>1,\*</sup>

1. Department of Pharmaceutical Sciences, College of Pharmacy, University of Michigan, Ann Arbor, Michigan 48109, USA
2. Department of Earth and Environment Sciences, College of Literature, Science, and the Arts, University of Michigan, Ann Arbor, Michigan 48109, USA

**Correspondence should be addressed to:** Duxin Sun, PhD, or Hongwei Chen, PhD, Department of Pharmaceutical Sciences, College of Pharmacy, The University of Michigan, 428 Church Street, Ann Arbor, MI 48109, Email: duxins@umich.edu (D. Sun); or hongweic@umich.edu (H. Chen)

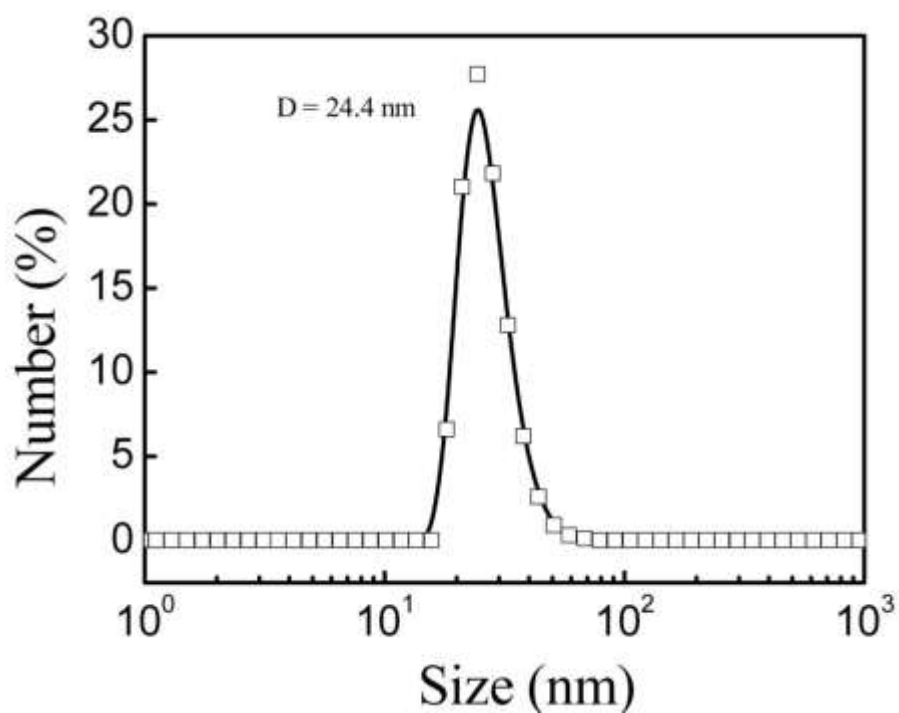

**Figure S1.** Hydrodynamic size distribution of polymer coated as-prepared HCIONPs in water.

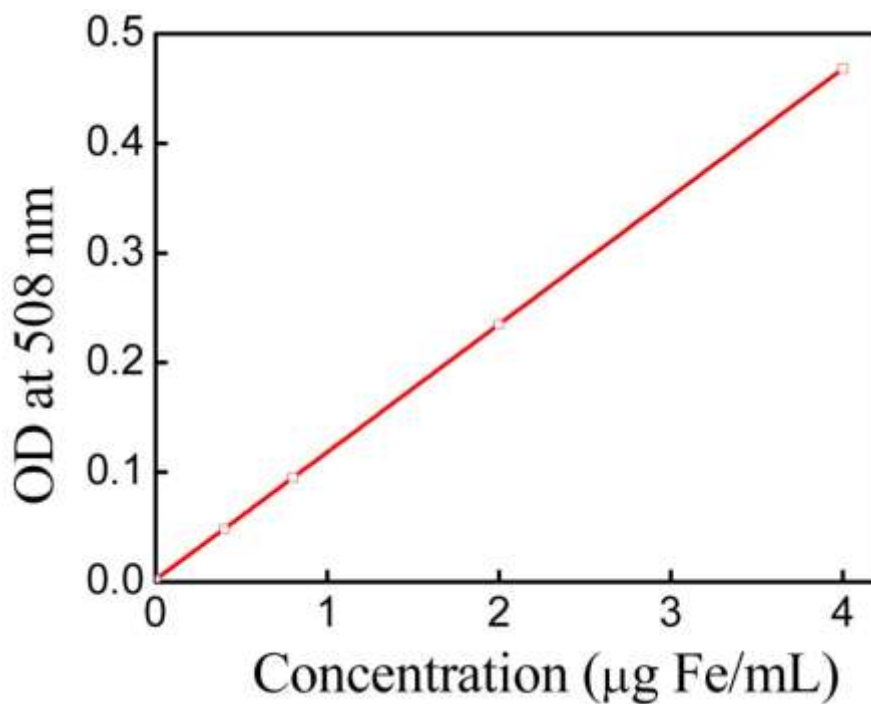

**Figure S2.** The calibration curve for determination of iron colorimetrically using 1,10-phenanthroline.

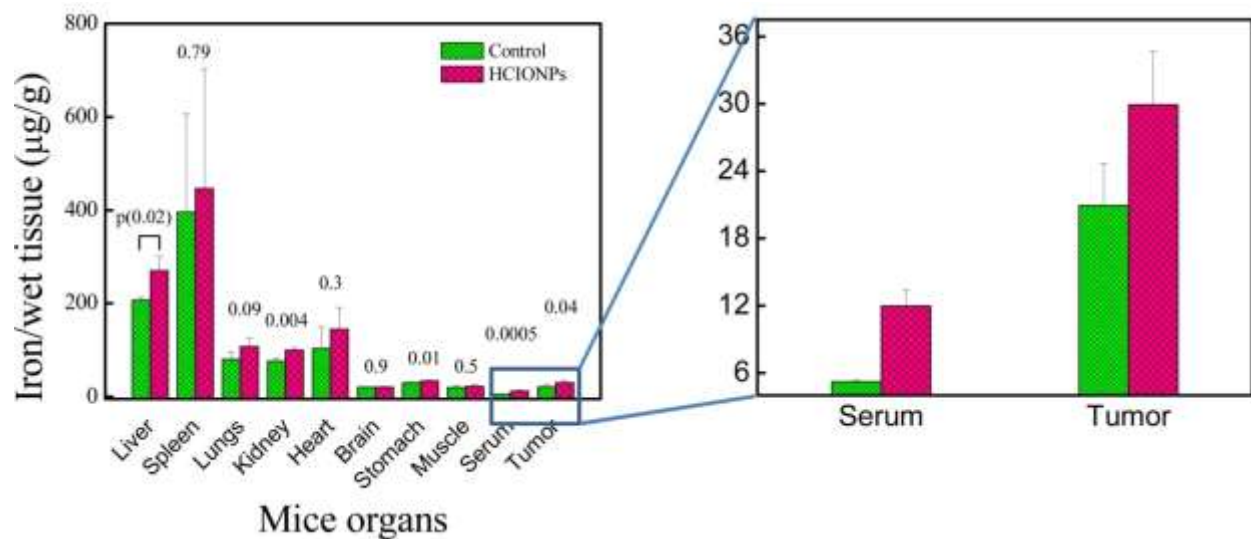

**Figure S3.** Biodistribution of polysiloxane-containing polymer coated HCIONPs in the major organs. The data is recorded from whole organ taken at 48 h post tail vein injection and the iron concentration is determined by ICP-OES. Each group has four mice, and the error bar is standard deviation. Numbers are *p*-value of iron content in each organ between two group mice.

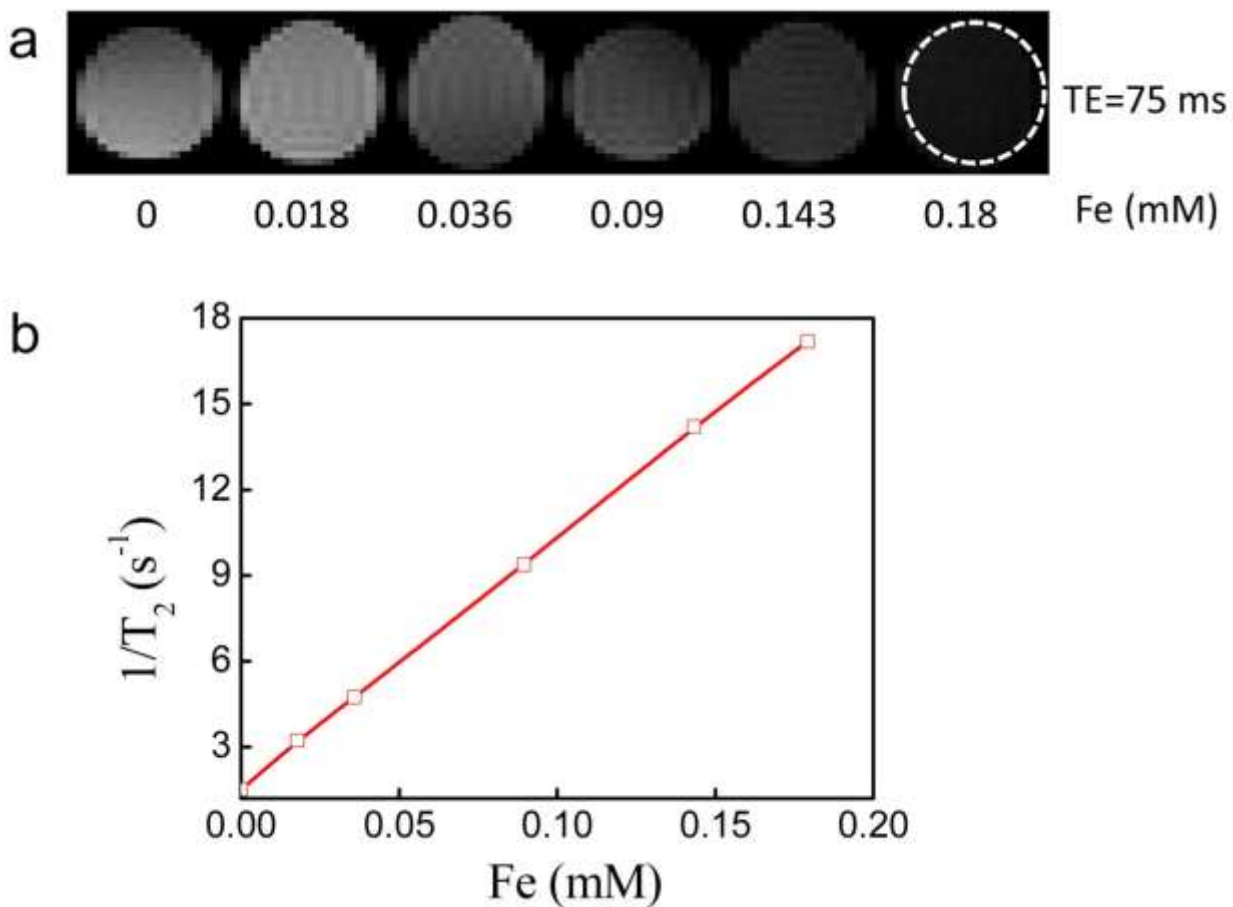

**Figure S4.** (a) T2-weighted MR images (b) T2 relaxation rates (R2) of as-prepared HClONP solutions at each concentration.

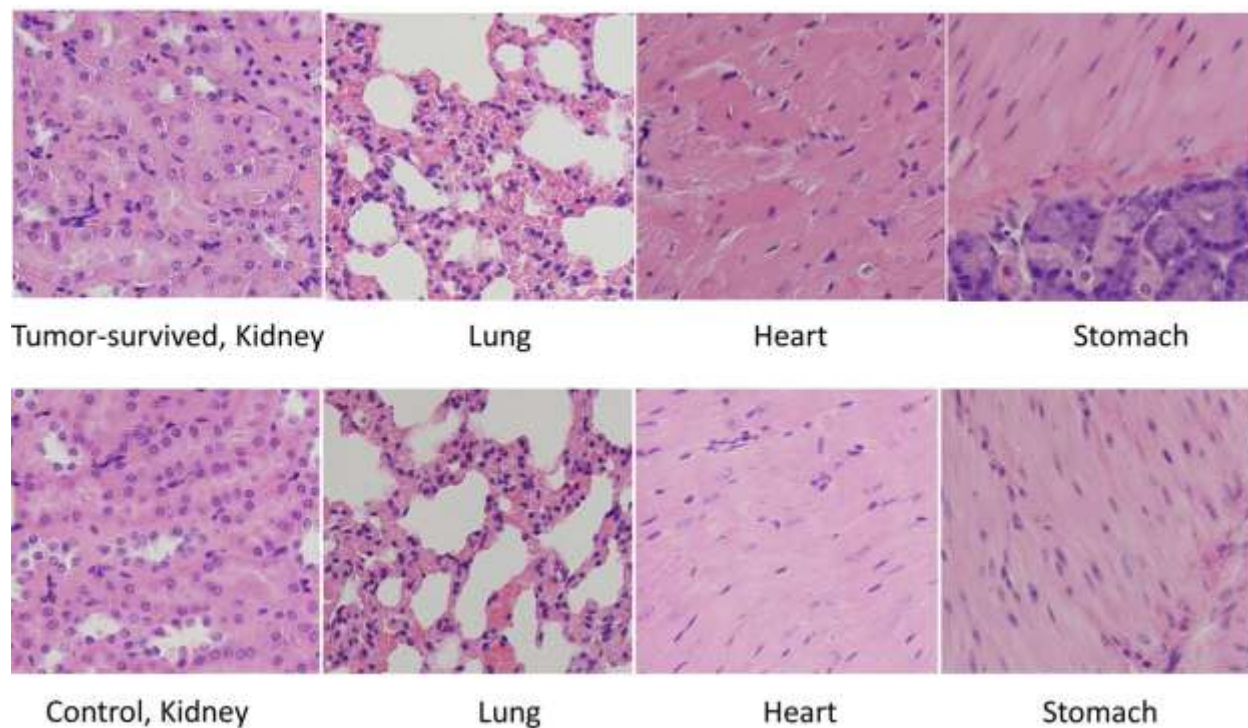

**Figure S5.** H&E tissue staining of the rest main organs from tumor-survived and control mouse.

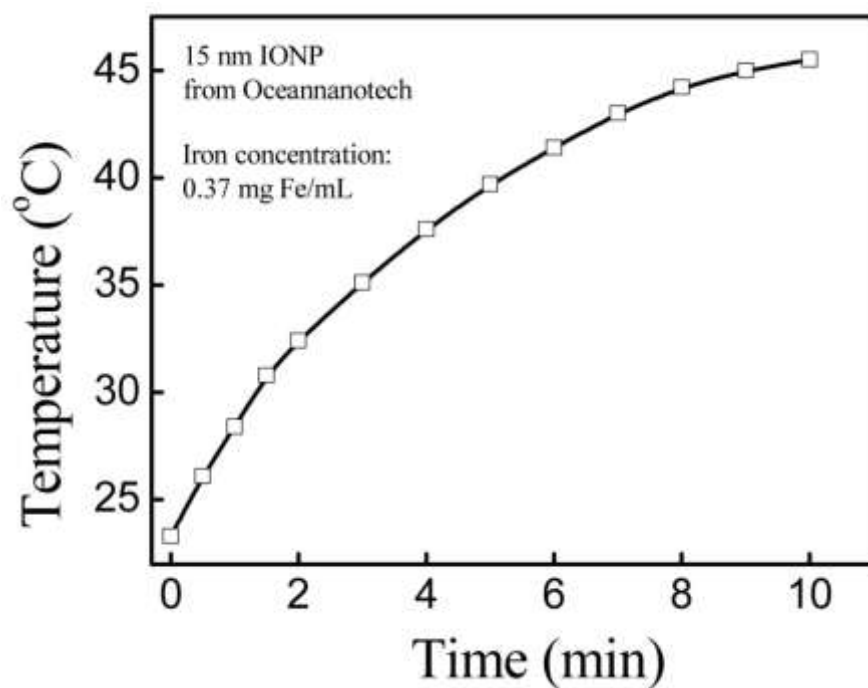

**Figure S6.** Measured temperature of commercial 15-nm magnetic nanocrystals from Oceannanotech. All temperatures were measured during 10 minutes of illumination with a diode laser ( $\lambda = 885$  nm) at a fluence rate of  $2.5 \text{ W/cm}^2$ .

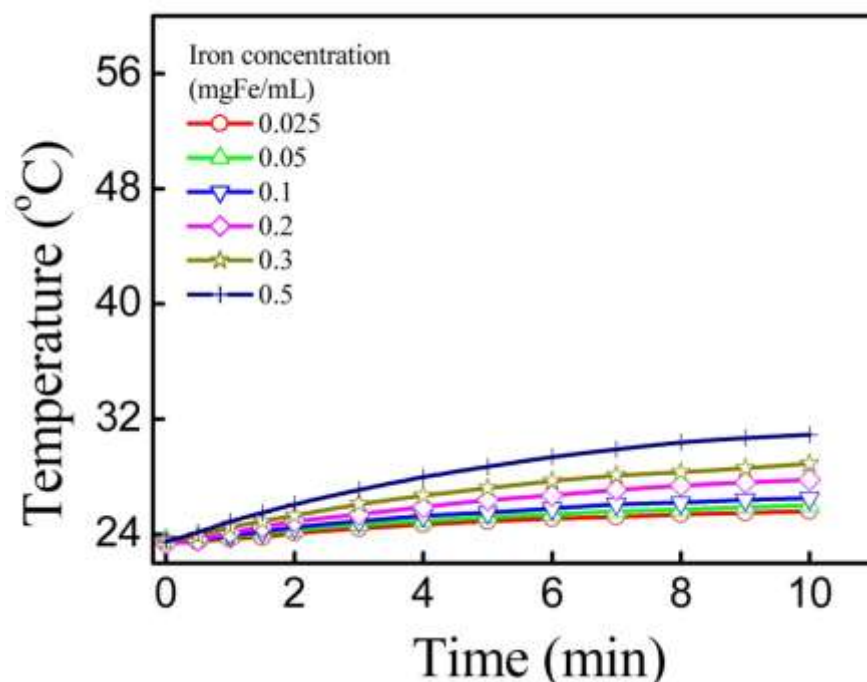

**Figure S7.** Measured temperature of increasing concentrations of magnetic nanoparticles from FeREX in water. All temperatures were measured during 10 minutes of illumination with a diode laser ( $\lambda = 885$  nm) at a fluence rate of  $2.5 \text{ W/cm}^2$ .

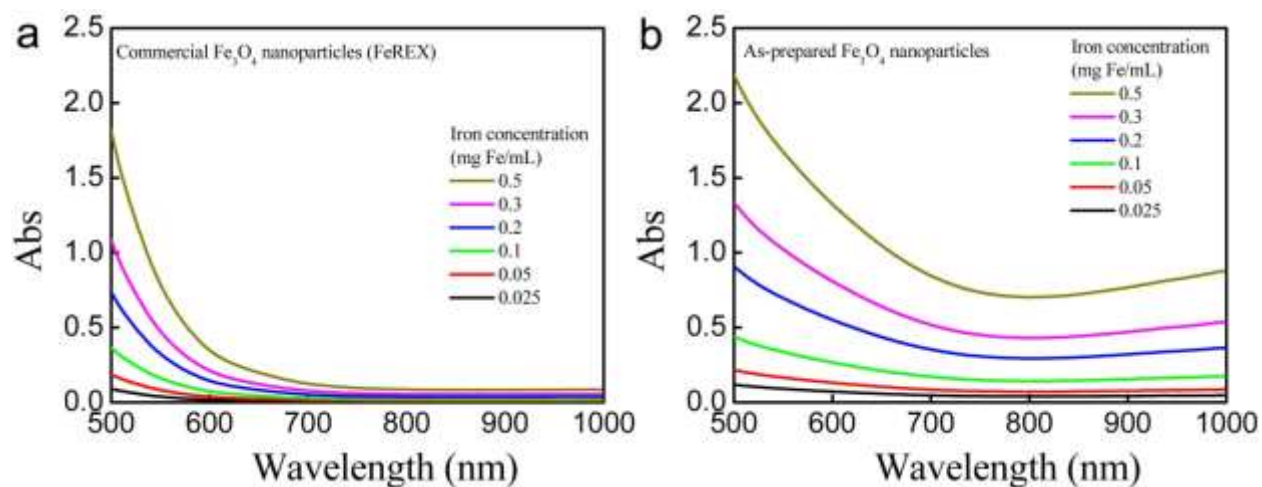

**Figure S8.** (a) UV-vis-NIR absorbance spectra of commercial magnetic nanoparticles from FeREX (a) and as-prepared HClONPs (b).

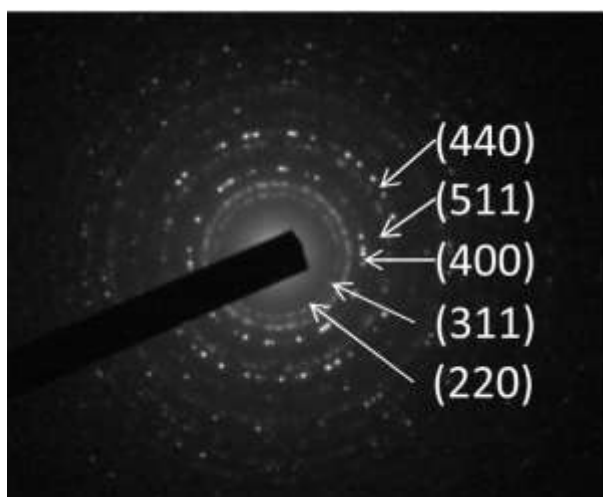

**Figure S9.** Electron diffraction of as-prepared HCIONPs.

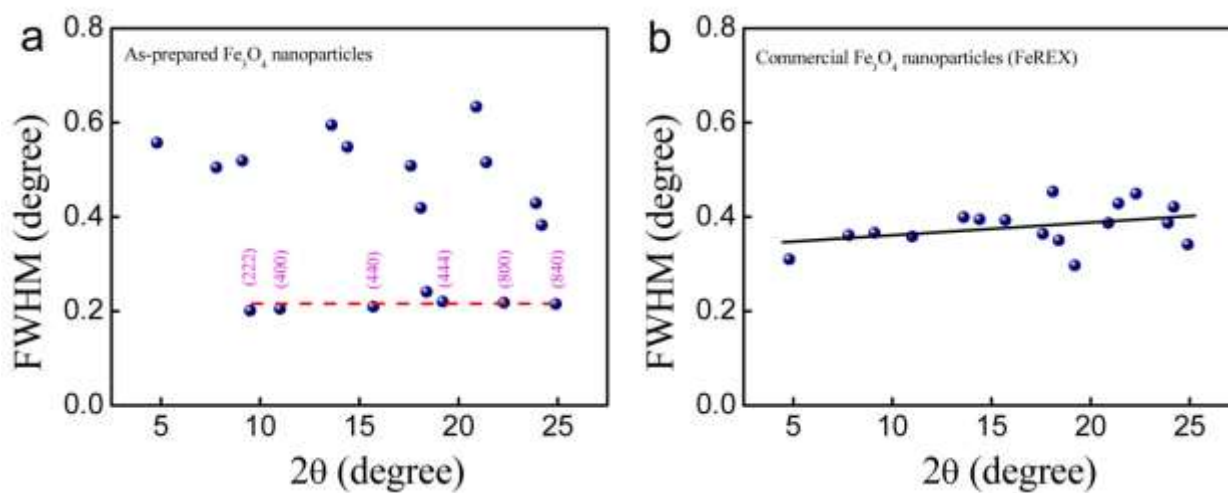

**Figure S10.** Full width at half maximum (FWHM) (degree) of as-prepared HCIONPs (a) and nanoparticles from FeREX (b). The pink dotted line (left) indicates that all fourfold symmetry indexes have smaller FWHM than other indexes from the same sample. The black solid line (right) is the best linear fit of all the data points.



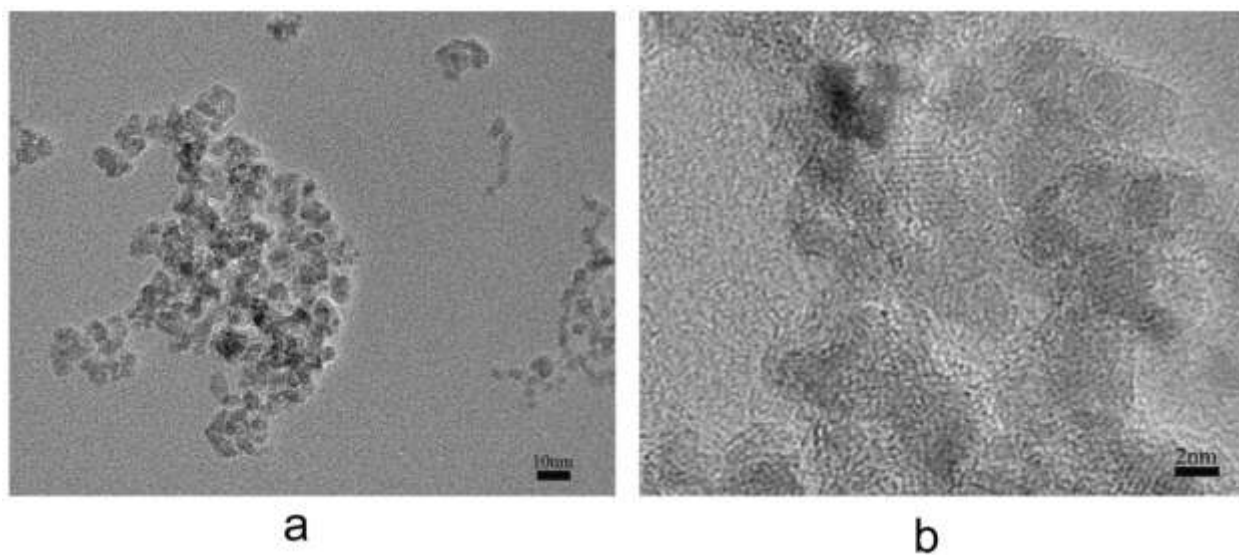

**Figure S11.** (a) TEM image and (b) High-resolution TEM image of magnetic nanoparticles from FeRex
